# Supplementary material for: Helical columnar phase of mesogen-jacketed liquid crystal polymers for efficient circularly polarized luminescence
Source: Royal Society of Chemistry journal article supplement (doi:10.1039/d4tc00498a), 2024-01-01
Supplement: d4tc00498a1.pdf [file d4tc00498a1.pdf]

## Supporting Information

# Helical Columnar Phase of Mesogen-Jacketed Liquid Crystal Polymers for Efficient Circularly Polarized Luminescence

Zui Liu, Fengyu Deng, Chunyan Fan, Yongjie Yuan\* and Hailiang Zhang\*

Key Laboratory of Polymeric Materials and Application Technology of Hunan Province, Key Laboratory of Advanced Organic Functional Materials of Colleges and Universities of Hunan Province, College of Chemistry, Xiangtan University, Xiangtan 411105, Hunan Province, China.

\* Corresponding author

E-mail: hailiangzhang@xtu.edu.cn; yuanyongjie@xtu.edu.cn

### Materials

p-Hydroxybenzaldehyde (99%), 1-bromododecane (99%), 4-hydroxybenzyl cyanide (99%), dicyclohexylcarbodiimide (99%), 4-dimethylaminopyridine (98%) were purchased from Shanghai Aladdin Biochemical Technology Co., Ltd. and used without further purification. Anhydrous magnesium sulfate ( $\text{MgSO}_4$ , 99%), anhydrous potassium carbonate ( $\text{K}_2\text{CO}_3$ , 99%), potassium iodide (KI, 99%), dichloromethane (99.5%), chloroform (99.5%) and other solvent were obtained from Xilong Scientific Co., Ltd.

### Measurements and characterizations

The  $^1\text{H}$  NMR spectra of intermediates, monomers and polymers were measured by a Bruker ARX 400 MHz spectrometer. The molecular weight of intermediates and monomers were determined by Bruker Biflex III MALDI-TOF spectrometer. The

molecular weight and polydispersity index of polymers were measured by WATERS 1515 GPC. The thermal stability of polymers was measured by the TA Q50 instrument under the N<sub>2</sub> atmosphere with a heating rate of 20 °C/min. The phase textures and its change of polymers during the heating and cooling process were characterized by a Leica DM 4500 P polarizing microscope instrument (POM) with Linkam hot stage. The phase transition temperature of polymers was measured by a TA Q10 DSC instrument under N<sub>2</sub> atmosphere. To eliminate the thermal history, all the samples were firstly heated to 270°C and then cooled to -20°C under N<sub>2</sub> atmosphere at a rate of 20 °C min<sup>-1</sup>. The DSC curves during the second heating process at a heating rate of 10 °C min<sup>-1</sup> were recorded. The phase structure of polymers was confirmed by a high-flux X-ray instrument (SAXSess mc2, Anton Paar) equipped with a Kratky block collimation system and a GE ID3003 sealed-tube X-ray generator (Cu Ka). The UV-vis absorption spectra of samples were tested by the Agilent Cary 60 instrument. The FL emission spectra of samples were tested by the F-4600 instrument. The CPL emission spectra of samples were tested by the Jasco CPL-300. The CD spectra of samples were tested by the Jasco J-1700.

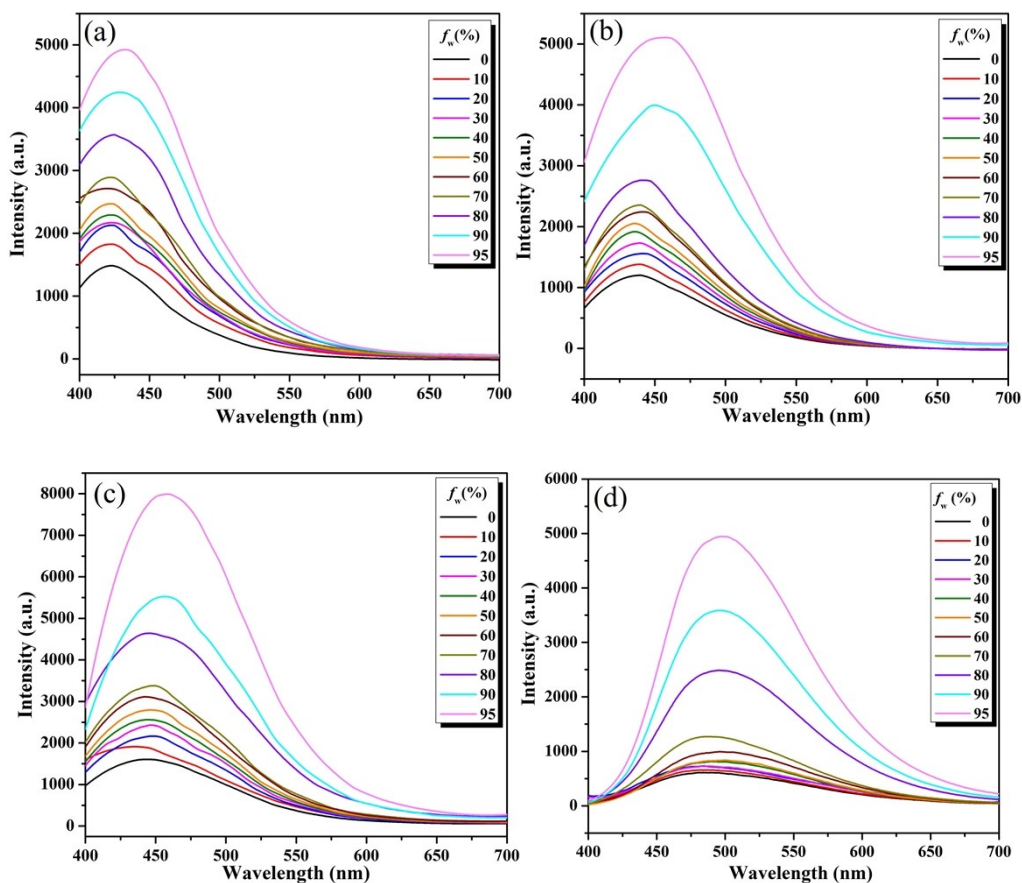

**Figure S1.** Emission spectra of (a) CN(0.2)-Chol(0.8), (b) CN(0.6)-Chol(0.4), (c) CN(0.8)-Chol(0.2) and (d) PMJ0CN12C in THF/H<sub>2</sub>O mixtures with different water volume fraction.

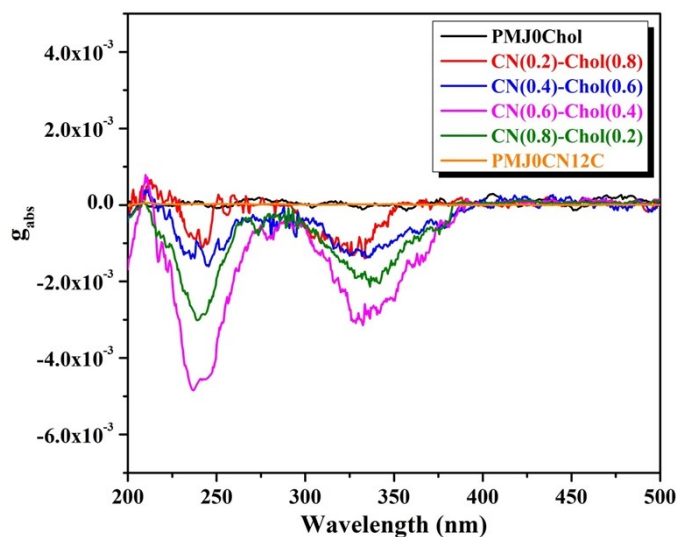

**Figure S2.** The fitted  $g_{abs}$  values of polymer films.

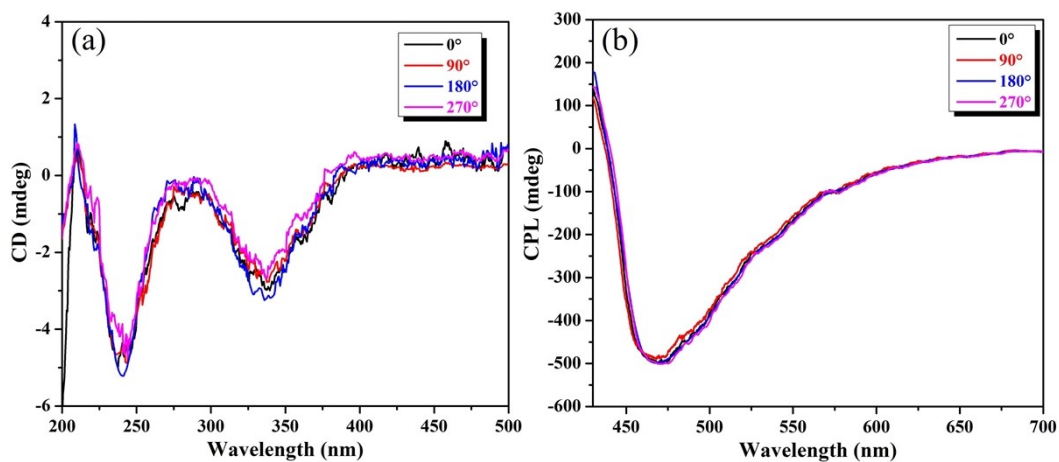

**Figure S3.** The (a) CD and (b) CPL spectra of CN(0.6)-Chol(0.4) at different rotation angle.

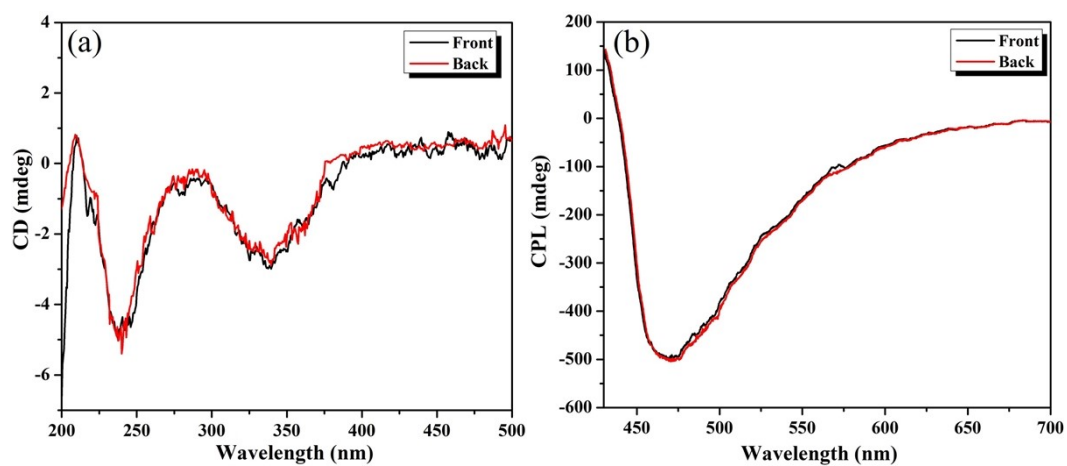

**Figure S4.** The (a) CD and (b) CPL spectra of the front and back surfaces of CN(0.6)-Chol(0.4) film.
